# Supplementary material for: Albumin Fusion at the N-Terminus or C-Terminus of HM-3 Leads to Improved Pharmacokinetics and Bioactivities
Source: MDPI journal article supplement (doi:10.3390/biomedicines9091084), 2021-08-25
Supplement: s1 [file s1]

## Supplementary materials

**Table S1**

**Table S1.** List of primers used in construction of pPink $\alpha$ -HC/HSA-HM-3 and pPink $\alpha$ -HC/HM-3-HSA.

| Primer           | Sequence (5'-3')                                        |
|------------------|---------------------------------------------------------|
| P <sub>HSA</sub> | GATGCTCATAAGTCTGAAGTTG                                  |
| R <sub>HSA</sub> | TTACAAACCCAAAGCAGCTTGAGAAGC                             |
| P <sub>1</sub>   | GAAGGCCTGATGCTCATAAGTCTGAAGTTGC                         |
| R <sub>1</sub>   | TAGAACCACCACCACCAGAACCACCACCACCCAAACCCAAAGCAGCTTGAGA    |
| R <sub>2</sub>   | CCTGGAACAGCAGCTCTATCAGCTCTTCTAACAATAGAACCACCACCACCAGAAC |
| R <sub>3</sub>   | CGGTACCTTAGTCACCTCTACCACCACCACCTGGAACAGCAGCTCTATC       |
| P <sub>2</sub>   | GGTGGTGGTGGTTCTGGTGGTGGTGGTTCTGATGCTCATAAGTCTGAAGTTGC   |
| P <sub>3</sub>   | GCTGCTGTTCCAGGTGGTGGTGGTAGAGGTGACGGTGGTGGTGGTTCTGGTGGT  |
| P <sub>4</sub>   | GAAGGCCTATTGTTAGAAGAGCTGATAGAGCTGCTGTTCCAGGTGGTGGT      |
| R <sub>4</sub>   | CGGTACCTTACAA ACCCAAAGCAGCTTGAGAAGC                     |

**Figure S1**

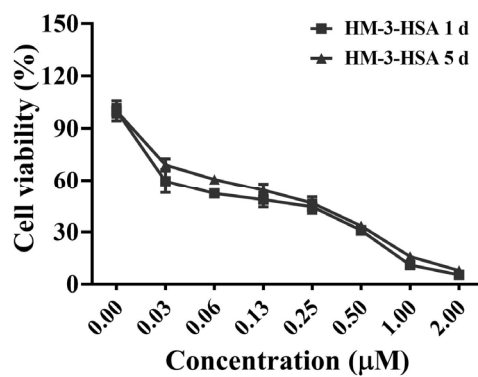

**Figure S1.** The anti-proliferation activity of HM-3-HSA at pH 7.0 after stored at 37°C for 1 and 5 days. Cells were incubated with various doses of HM-3-HSA for 48 h followed by cell viability evaluation using MTT assay. Data shown are means  $\pm$  standard deviation from three independent experiments.

**Figure S2**

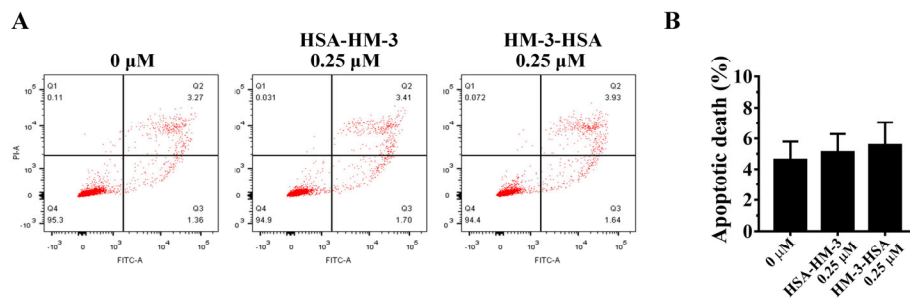

**Figure S2.** HM-3/HSA had no effect on cell apoptosis. (A, B) HM-3/HSA could not induce cell apoptosis in B16F10 cells. Cells were treated with the indicated concentration of HM-3/HSA for 48 h, and the level of apoptosis was determined using an An-nexin-V-FITC/PI double staining assay. Control: Cells treated with PBS vehicle only. Data shown are means  $\pm$  standard deviation from three independent experiments.
